# Supplementary material
Source: PubMed Central journal article supplement (PMC2937902)

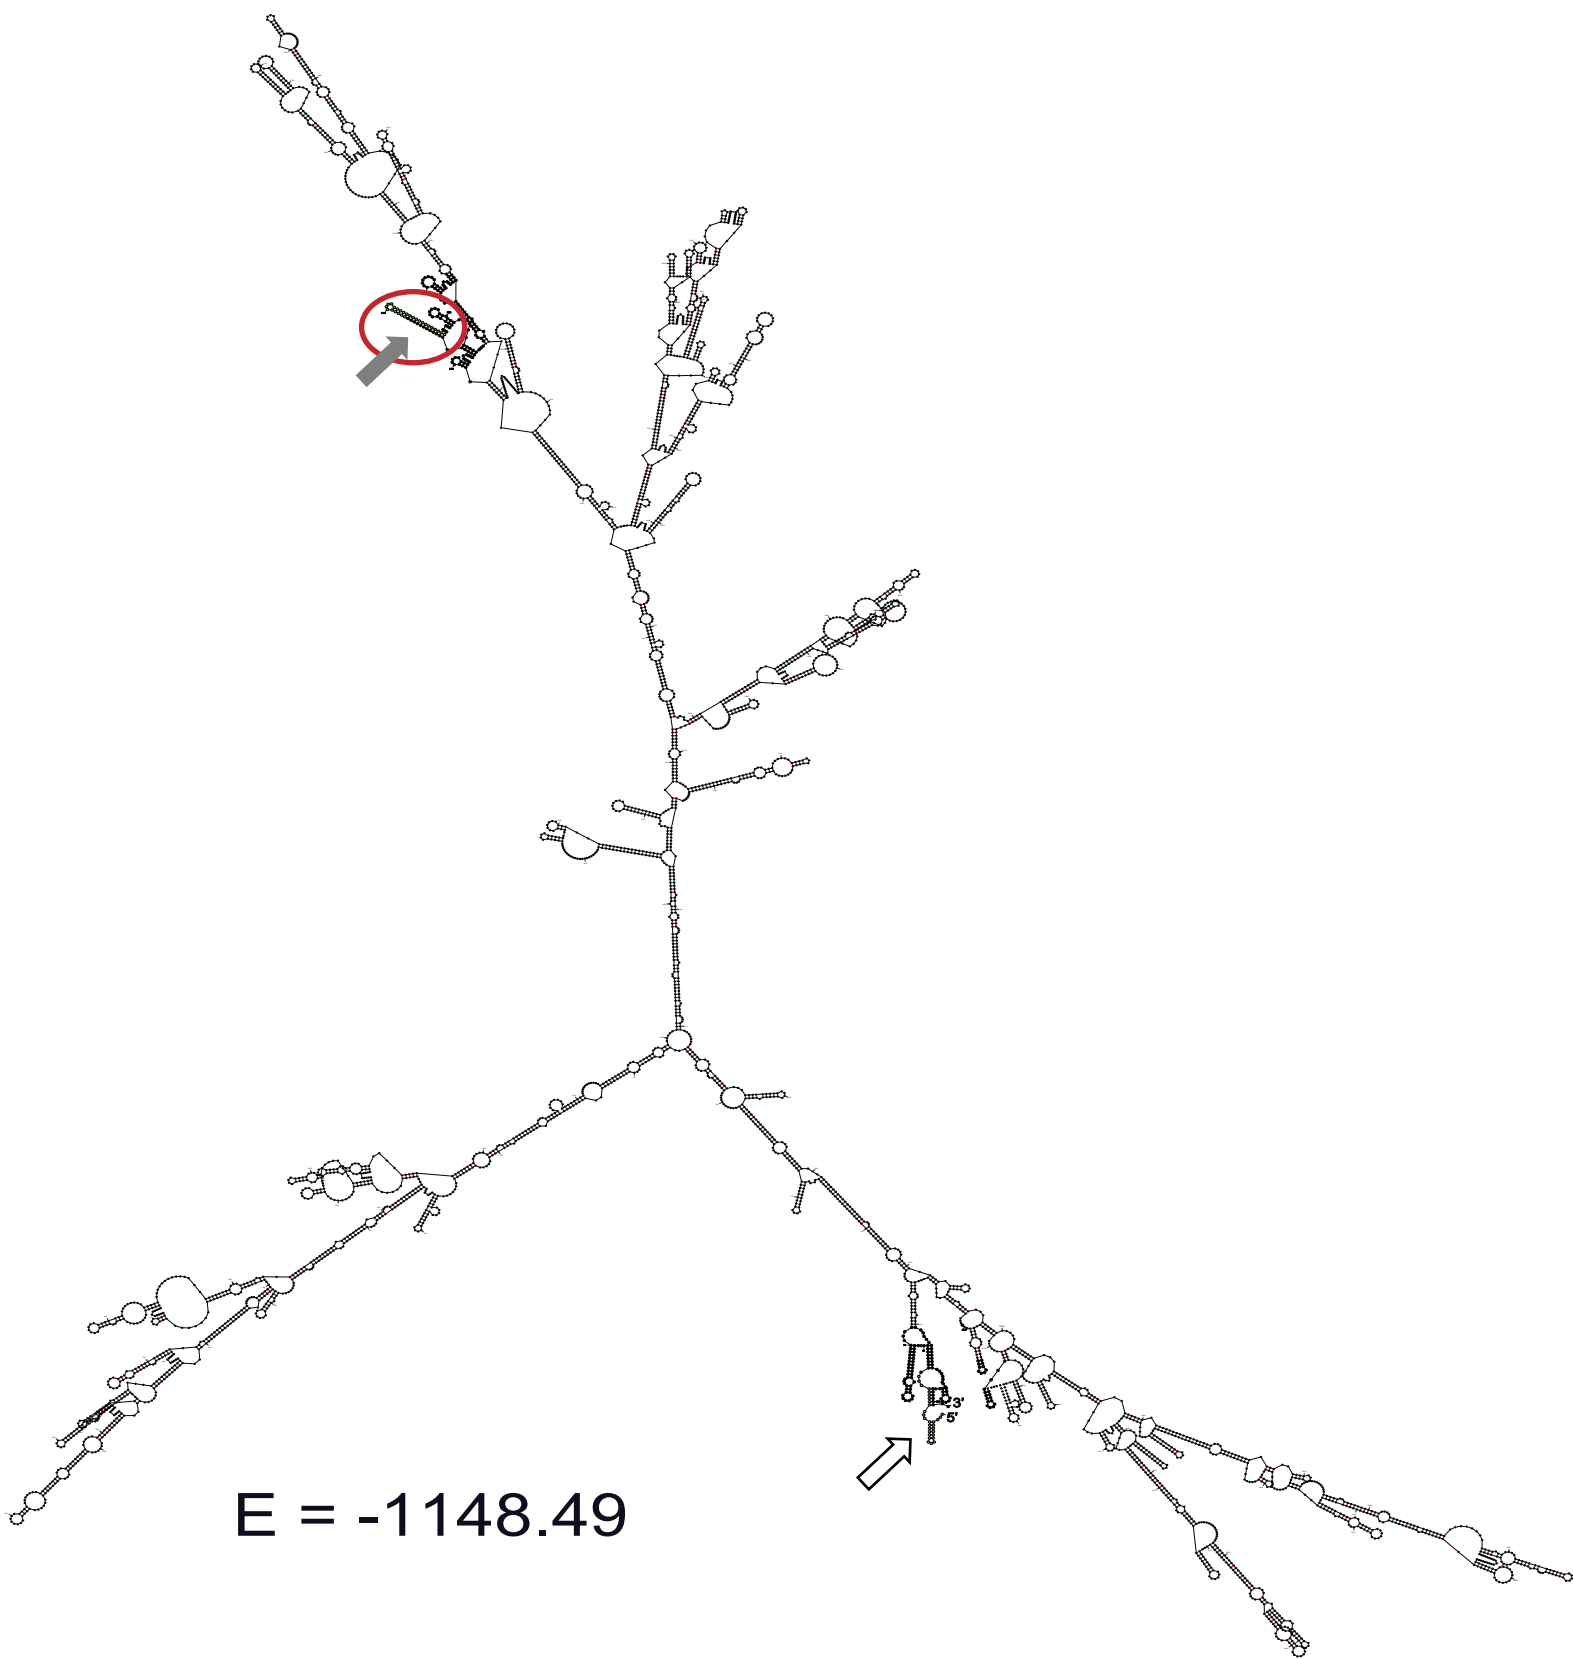

Supplement: supp_M110.154575_jbc.M110.154575-1.pdf [file supp_M110.154575_jbc.M110.154575-1.pdf]

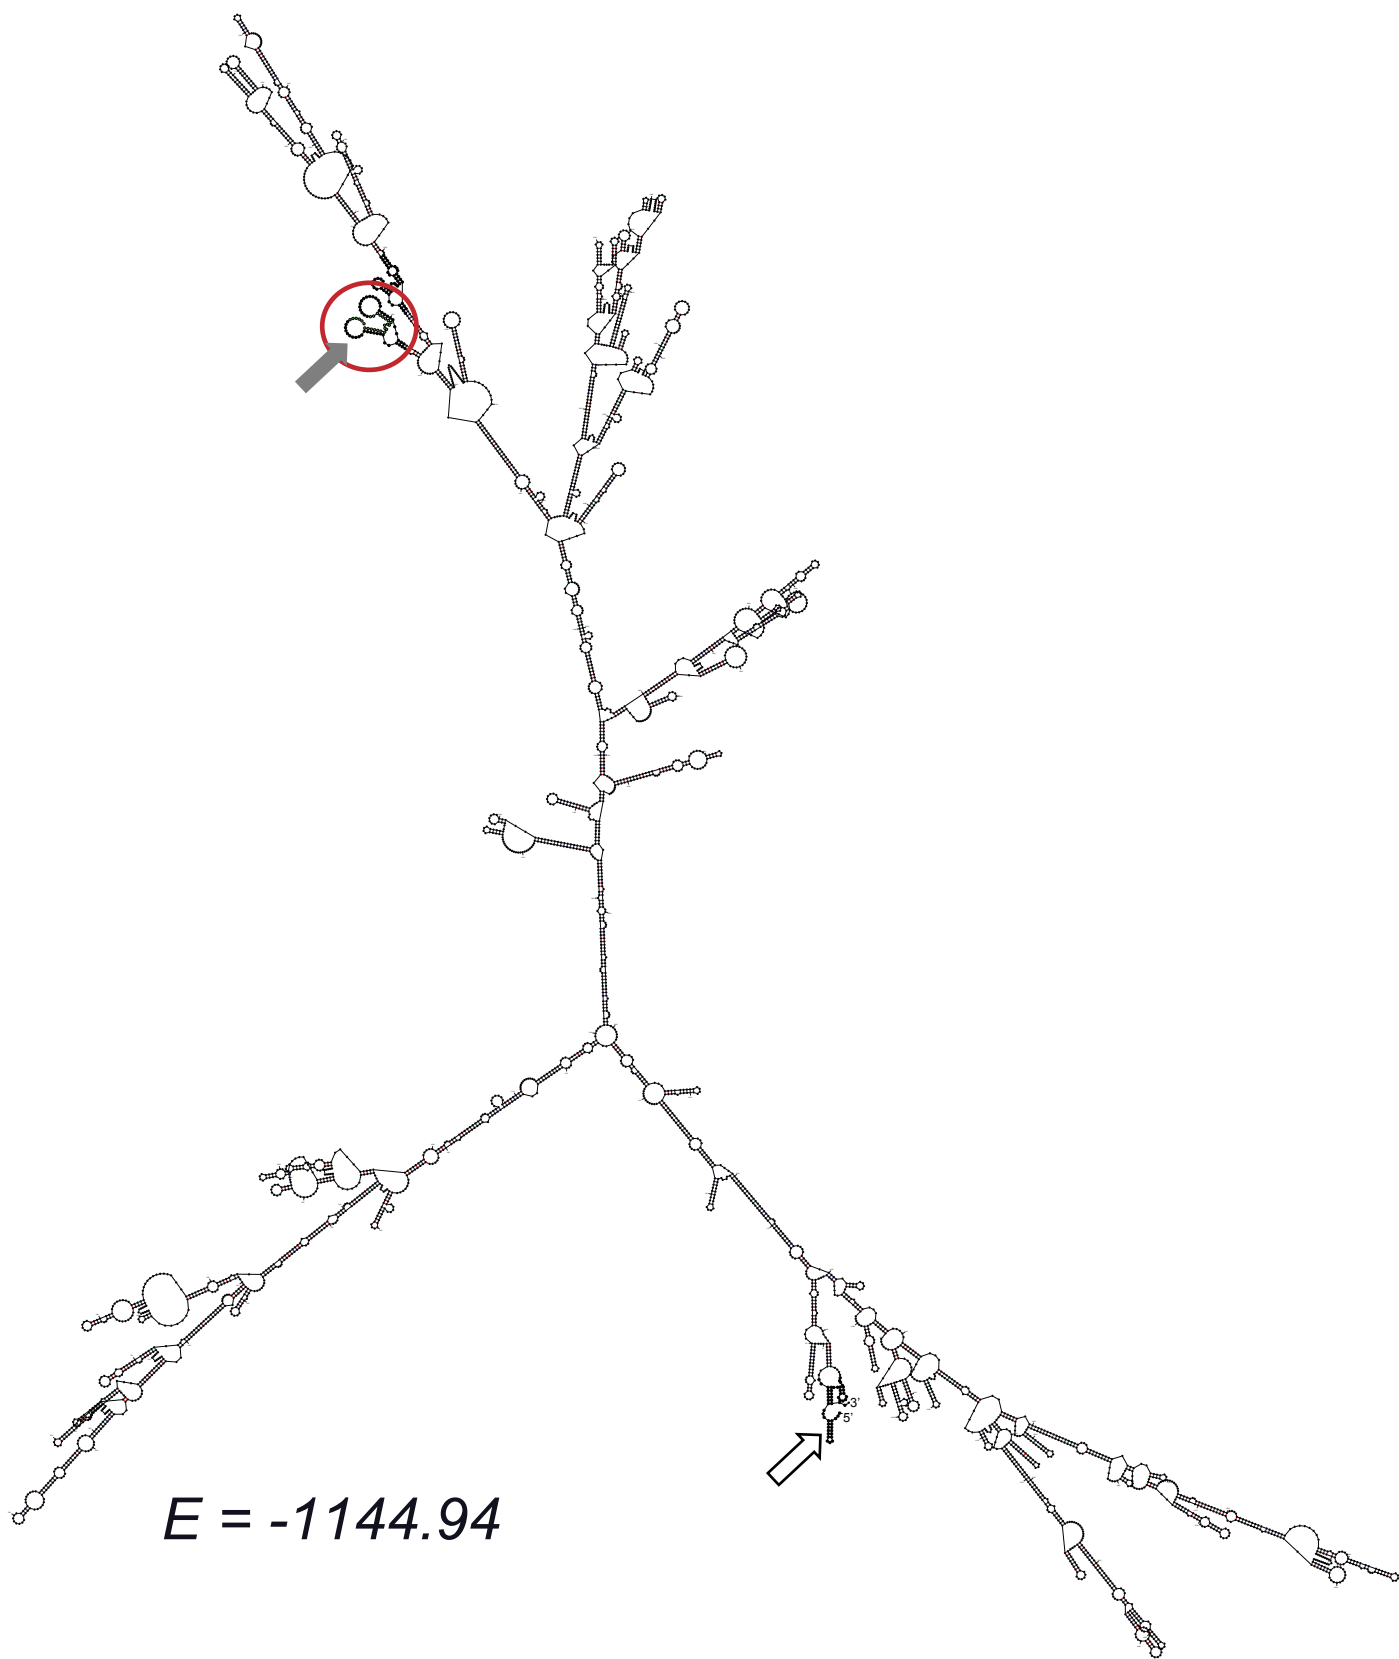

Supplement: supp_M110.154575_jbc.M110.154575-2.pdf [file supp_M110.154575_jbc.M110.154575-2.pdf]

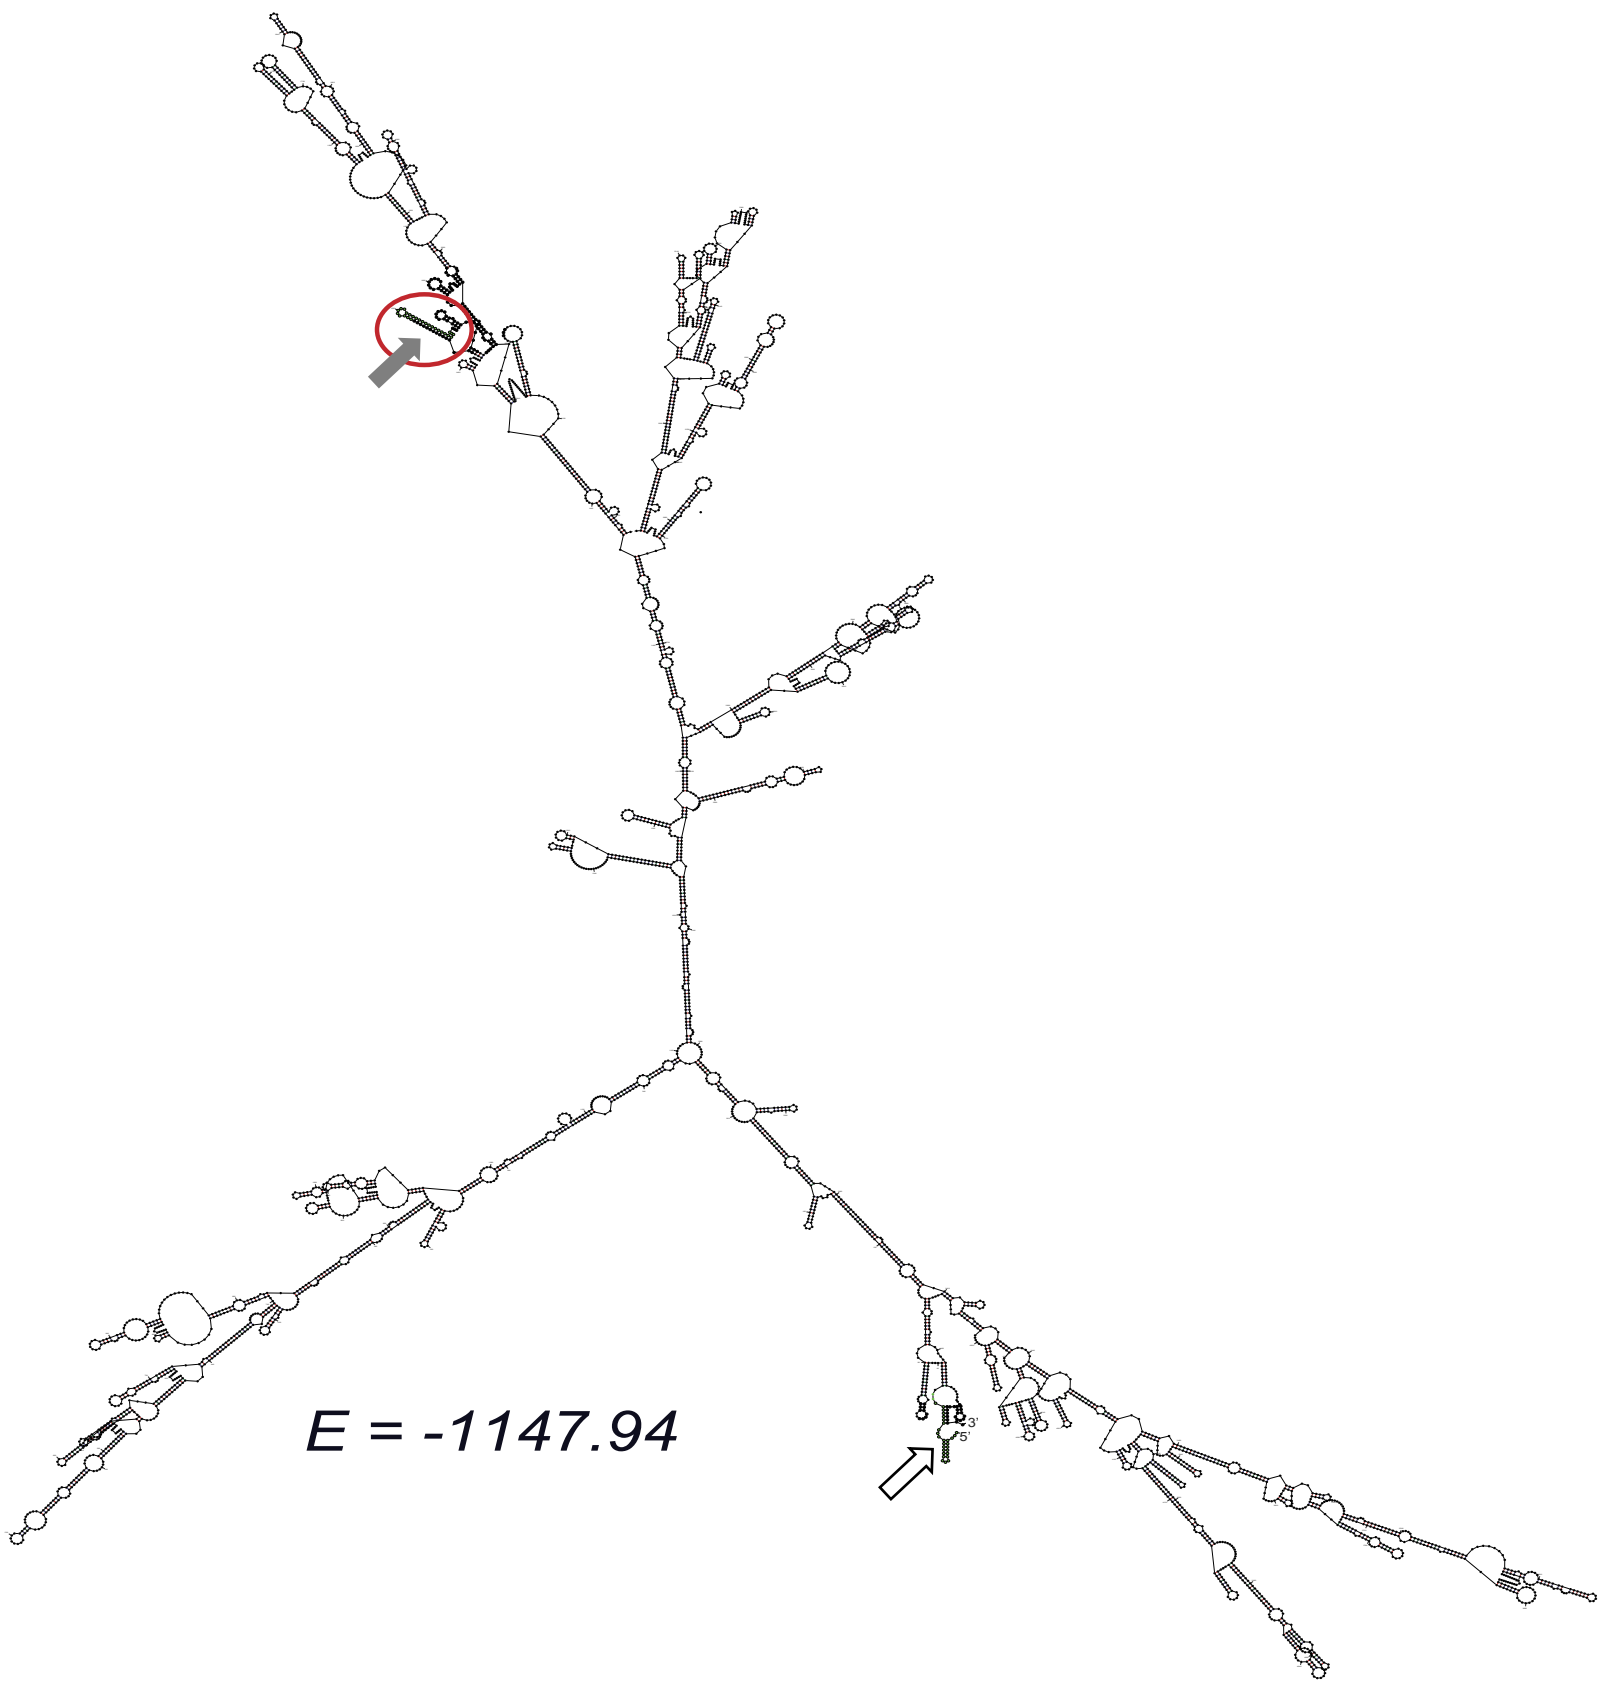

Supplement: supp_M110.154575_jbc.M110.154575-3.pdf [file supp_M110.154575_jbc.M110.154575-3.pdf]
